# Supplementary material
Source: publisher figshare collection journal article supplement (https://tandf.figshare.com/ndownloader/files/13877966)
Supplement: Supplementary file 1 [file 13877966]

## Supplementary Materials

### Appendix A. Development Effectiveness Matrix (DEM)

#### Project Logic

| <b>Program Diagnosis</b>                                                                                                                                       | <b>DEM Tutorial, the answer is "yes" if:</b>                                                                                                                                                                                                                                                                                       |
|----------------------------------------------------------------------------------------------------------------------------------------------------------------|------------------------------------------------------------------------------------------------------------------------------------------------------------------------------------------------------------------------------------------------------------------------------------------------------------------------------------|
| <b>The main problem being addressed by the project is clearly identified</b>                                                                                   | The "Background and Problem Addressed" section of the POD specifies:<br>i) clear, accurate, and adequate information about the situation.<br>ii) the reasons why the situation constitutes a problem requiring a solution.<br>iii) basic quantitative and qualitative data that allow for an adequate dimensioning of the problem. |
| <b>The intended beneficiary population is clearly identified (households, localities, firms, users, or overall population)</b>                                 | The "Background and Problem Addressed" section of the POD clearly specify the households, localities, firms, persons, among other entities, that are expected to receive goods and services delivered by the project, and that fulfill certain characteristics.                                                                    |
| <b>The main factors (or causes) contributing to the problem are clearly identified</b>                                                                         | The "Background and Problem Addressed" section of the POD includes the relationships and interactions that occur among the factors and elements that constitute the problem.                                                                                                                                                       |
| <b>Empirical evidence of the main determinants of the problem is provided (See Guidelines for guidance on what constitutes sufficient empirical evidence)</b>  | The "Background and Problem Addressed" section of the POD includes the basic quantitative and qualitative data that allow for an adequate dimensioning of the factors.                                                                                                                                                             |
| <b>Magnitudes of deficiencies are provided for main factors (in order to assess the relative importance of identified factors)</b>                             | The "Background and Problem Addressed" section of the POD includes, in a precise manner, a review of studies or assessments that try to identify and quantify the contribution of the main determinants of the problem. The POD should include the references to these studies.                                                    |
| <b>Diagnosis takes into account specific country characteristics in the area of project intervention</b>                                                       | The "Background and Problem Addressed" section of the POD includes, in a precise manner, the historical, political, social, and economic context in which the problem arose, as well as those in which its solution will be attempted.                                                                                             |
| <b>Proposed Interventions or Solutions</b>                                                                                                                     | <b>DEM Tutorial, the answer is "yes" if:</b>                                                                                                                                                                                                                                                                                       |
| <b>Proposed Intervention(s) are clearly linked to problems or needs identified in the Diagnosis</b>                                                            | There is a clear and precise specification on how the proposed intervention will contribute to solve the problems identified in the diagnosis. The proposed intervention should include all problems or needs identified in the Diagnostic. If not, a justification of why the Bank is not going to intervene should be presented. |
| <b>Evidence of the effectiveness of the intervention(s) is based on existing evaluations of interventions in other or similar contexts (internal validity)</b> | The "Justification" section of the POD includes empirical evidence (quantitative and qualitative updated data) of the effectiveness of similar interventions. The POD should specify the references to these studies, and as mentioned before, also the specific empirical evidence contained in each study.                       |

|                                                                                                                                       |                                                                                                                                                                                                                                                                                                                                                    |
|---------------------------------------------------------------------------------------------------------------------------------------|----------------------------------------------------------------------------------------------------------------------------------------------------------------------------------------------------------------------------------------------------------------------------------------------------------------------------------------------------|
| <b>Information about the applicability of the intervention in the country where it is implemented is provided (external validity)</b> | The "Background and Problem Addressed" section of the POD includes, in a precise manner, a review of studies or assessments that addresses the degree to which the intervention would hold in the country in which the intervention will be implemented, and in a certain time and moment. The POD should include the references to these studies. |
| <b>The dimension of proposed solution is related to the objective of the project and its magnitude</b>                                | The scope of the interventions (mainly addressed by the Indicators in the results matrix) is clearly related to the magnitude of the problem.                                                                                                                                                                                                      |

## Results Matrix Quality

| <b>Vertical Logic</b>                                                                                                                                                                                                                                                                                                                                                                                                                                                                                                                                                                                                                                                                                                                                                       |
|-----------------------------------------------------------------------------------------------------------------------------------------------------------------------------------------------------------------------------------------------------------------------------------------------------------------------------------------------------------------------------------------------------------------------------------------------------------------------------------------------------------------------------------------------------------------------------------------------------------------------------------------------------------------------------------------------------------------------------------------------------------------------------|
| <p>Verify the vertical logic. Each level logically contributes to the next higher level.</p> <p>Inputs → Activities → Outputs → Outcomes → Impacts</p> <p>Top down: Ask how a particular level can be attained. The answer should be: by successful completion of the immediate lower level</p> <p>Bottom up: Ask why a particular level is being done. The answer should be: in order to attain the next higher level.</p>                                                                                                                                                                                                                                                                                                                                                 |
| <b>Impact of the program</b>                                                                                                                                                                                                                                                                                                                                                                                                                                                                                                                                                                                                                                                                                                                                                |
| <p>The desired medium- or long-term impacts are stated in the POD and are clearly related to the country strategy/country program results matrix for that sector or area of intervention. In fact, the impact of the project usually is the same as the stated sector objective and indicator for a country strategy result matrix.</p> <p>A single project may generally not be the sole means for attaining the general objective; it may only contribute towards the general objective indirectly. Several other countries and/ or sector programs are needed to support the achievement of the general objective or desired impact. They are specified as an expected verifiable achievement that is expected as a medium- or long-term result of the intervention.</p> |
| Indicators are SMART (Specific, Measurable, Achievable, Relevant and Time-bound).                                                                                                                                                                                                                                                                                                                                                                                                                                                                                                                                                                                                                                                                                           |
| Every indicator has a baseline value or a predetermined starting point for subsequent comparison of performance.                                                                                                                                                                                                                                                                                                                                                                                                                                                                                                                                                                                                                                                            |
| Every indicator has a target value. A target is a predetermined level of success that is expected within a specified timeframe. In the case of performance-based loans the accomplishment of targets trigger disbursement, otherwise targets are indicative directions for change.                                                                                                                                                                                                                                                                                                                                                                                                                                                                                          |
| Every indicator has one source of data, or a clear plan for collecting it.                                                                                                                                                                                                                                                                                                                                                                                                                                                                                                                                                                                                                                                                                                  |
| <b>Outcomes</b>                                                                                                                                                                                                                                                                                                                                                                                                                                                                                                                                                                                                                                                                                                                                                             |
| <p>The desired improvements (effects) as a result of the project are clearly stated.</p> <p>The outcome (s) should describe what is expected to be different as a result of the delivery of project outputs by the project; NOT what the project is going to do.</p> <p>They are stated as expected, verifiable achievements (i.e. increased reading scores for children, decrease in malnutrition, etc. are project outcomes of cash transfer programs. Potable water access 24/7 can be an outcome of a water project. Lower transportation cost is an outcome of a roads project. Reduced time or cost for legalizing a business is a public sector project outcome.)</p>                                                                                                |
| Indicators are SMART (Specific, Measurable, Achievable, Relevant and Time-bound).                                                                                                                                                                                                                                                                                                                                                                                                                                                                                                                                                                                                                                                                                           |

|                                                                                                                                                                                                                                                                                                                                                                            |
|----------------------------------------------------------------------------------------------------------------------------------------------------------------------------------------------------------------------------------------------------------------------------------------------------------------------------------------------------------------------------|
| Every indicator has a baseline value or a predetermined starting point for subsequent comparison of performance.                                                                                                                                                                                                                                                           |
| Every indicator has a target value. A target is a predetermined level of success that is expected within a specified timeframe. In the case of performance-based loans the accomplishment of targets trigger disbursement, otherwise targets are indicative directions for change.                                                                                         |
| Every indicator has one source of data, or a clear plan for collecting it.                                                                                                                                                                                                                                                                                                 |
| <b>Outputs</b>                                                                                                                                                                                                                                                                                                                                                             |
| Project deliverables are clearly specified.<br>Outputs are project “deliverables”. They summarize what the project is contractually accountable to provide. They are stated as expected, verifiable achievements.<br>(i.e. school access increased, children de-wormed, hectares planted, new procedures operational, personnel trained, # of connections to clean water). |
| Indicators are SMART (Specific, Measurable, Achievable, Relevant and Time-bound).                                                                                                                                                                                                                                                                                          |
| Every indicator has a baseline value or a predetermined starting point for subsequent comparison of performance.                                                                                                                                                                                                                                                           |
| Every indicator has a target value. A target is a predetermined level of success that is expected within a specified time frame. In the case of performance-based loans the accomplishment of targets trigger disbursement, otherwise targets are indicative directions for change.                                                                                        |
| Every indicator has one source of data, or a clear plan for collecting it.                                                                                                                                                                                                                                                                                                 |

## Economic Analysis

|                                                                                                                                       |
|---------------------------------------------------------------------------------------------------------------------------------------|
| <b>Cost-Benefit Analysis (CBA)</b>                                                                                                    |
| The project has an ERR and/or NPV for its main components.                                                                            |
| The economic benefits are adequately identified and quantified.                                                                       |
| All real resource costs generated by the project during its life are included in the calculation.                                     |
| Assumptions used in the analysis are reasonable and clearly spelled out.                                                              |
| Sensitivity analysis is performed and includes all key variables that could affect project costs, benefits and assumptions.           |
| <b>Cost-Effectiveness (CEA)</b>                                                                                                       |
| The project has a cost-effectiveness analysis for its main components.                                                                |
| Key outcomes are adequately identified.                                                                                               |
| All available alternatives are considered.                                                                                            |
| The economic costs of each alternative are adequately estimated.                                                                      |
| Reasonable assumptions are used in the analysis.                                                                                      |
| Sensitivity analysis is performed and includes all key variables that could affect the costs of the alternatives and the assumptions. |

## Monitoring and Evaluation

| Monitoring & Evaluation                                                                                                                                            |
|--------------------------------------------------------------------------------------------------------------------------------------------------------------------|
| I. Monitoring                                                                                                                                                      |
| The Bank and borrower have agreed to use the results matrix and the activities defined in the PMR to monitor the operation.                                        |
| Outputs indicators have annual targets.                                                                                                                            |
| Total project costs are grouped by each expected output.                                                                                                           |
| Costs for each output have annual expected amounts.                                                                                                                |
| The sum of the total planned costs for all outputs is equivalent to the total project amount (including counterpart) detailed in the Loan Proposal.                |
| Monitoring mechanisms have been planned and budgeted.                                                                                                              |
| Ensure that the source, or means for collecting data (for outcomes, outputs and activities) actually exists, either with the executing agency or/and with the IDB. |

| General Evaluation Arrangements                                                                     |
|-----------------------------------------------------------------------------------------------------|
| General                                                                                             |
| The project has an evaluation plan in accordance to the Bank's guidelines for DEM of SG operations. |
| Timelines are defined to design survey tools/collect baseline/follow up surveys.                    |
| The evaluation plan has allocated budget.                                                           |

| Methodology to measure incremental benefits Ex post (at completion)                                                                                                                                                                                                                                |
|----------------------------------------------------------------------------------------------------------------------------------------------------------------------------------------------------------------------------------------------------------------------------------------------------|
| Method used to evaluate results:                                                                                                                                                                                                                                                                   |
| 1. Random Assignment and/or Non-Experimental Methods (Difference-in-Differences, Propensity Score Matching, Regression Discontinuity, Instrumental Variables, Simulation Model, or other approaches that allow attribution)                                                                        |
| 2. Ex-post Cost-Benefit Analysis                                                                                                                                                                                                                                                                   |
| 3. Ex-post Cost-Effectiveness Analysis                                                                                                                                                                                                                                                             |
| 4. Before-After or With-Without Comparison (no attribution)                                                                                                                                                                                                                                        |
| Evaluation aspects required to be defined at project design                                                                                                                                                                                                                                        |
| A valid comparison/control group has been selected.                                                                                                                                                                                                                                                |
| The definition of the counterfactual was done at the appropriate level (groups, organizations or individuals), taking into account that it may be necessary to assign groups in order to evaluate (i) interventions with sizeable spillover effects, (ii) interventions delivered to whole groups. |
| Power analysis was performed to ensure that meaningful impacts will be detected.                                                                                                                                                                                                                   |
| The number of waves of data collection and the timing for data collection have been determined.                                                                                                                                                                                                    |
| The information that needs to be collected (survey questionnaire) and other variables of interest are specified.                                                                                                                                                                                   |

# Appendix B. Full Results: Satisfactory Cost Performance; Cost Performance Difference; Satisfactory Schedule Performance

|                                                   | Satisfactory Cost Performance |     |             |     | Cost Performance Difference |     |             |     | Satisfactory Schedule Performance |     |             |     |
|---------------------------------------------------|-------------------------------|-----|-------------|-----|-----------------------------|-----|-------------|-----|-----------------------------------|-----|-------------|-----|
|                                                   | Last Score                    |     | Full Sample |     | Last Score                  |     | Full Sample |     | Last Score                        |     | Full Sample |     |
|                                                   | (Probit)                      |     | (GEE)       |     | (Probit)                    |     | (GEE)       |     | (Probit)                          |     | (GEE)       |     |
| Project Logic Score                               | 0.035                         | *** | 0.03        | *** | -4.999                      | *** | -2.469      | **  | 0.033                             | **  | 0.032       | **  |
| Economic Analysis Score                           | 0.06                          |     | 0.099       | *** | -7.404                      |     | -9.278      | **  | -0.042                            |     | 0.017       |     |
| Monitoring Score                                  | 0.012                         |     | 0.012       |     | 9.096                       |     | 5.232       |     | 0.023                             |     | -0.043      |     |
| Evaluation Score                                  | -0.021                        | *   | -0.003      |     | 1.745                       |     | -0.563      |     | -0.002                            |     | 0.001       |     |
| Year=2009                                         | 0.095                         |     | 0.051       |     | -9.557                      |     | -5.416      |     | -0.021                            |     | 0.091       |     |
| Year=2010                                         | 0.203                         | **  | 0.079       |     | -28.29                      | **  | -15.576     | **  | -0.014                            |     | 0.104       |     |
| Year=2011                                         | 0.149                         |     | 0.001       |     | -27.57                      |     | -5.63       |     | 0.036                             |     | 0.151       |     |
| Year=2012                                         | 0.287                         |     | 0.112       |     | -44.60                      |     | -26.73      | *   | 0.155                             |     | 0.327       | **  |
| Year=2013                                         | 0.294                         |     | -0.07       |     | -56.98                      |     | -8.948      |     | 0.162                             |     | 0.143       |     |
| Year=2014                                         | 0.741                         | **  | 0.442       | **  | -100.2                      | **  | -70.94      | *** | 0.515                             |     | 0.678       | *** |
| Project Delay                                     | -0.003                        | *** | -0.003      | *** | 0.307                       | *** | 0.308       | *** | -0.004                            | *** | -0.004      | *** |
| Specific Project Yes=1                            | -0.003                        |     | -0.003      |     | -0.434                      |     | -0.11       |     | -0.039                            |     | -0.051      |     |
| % Change in Real GDP Per Capita                   | -0.371                        |     | -0.644      |     | -63.35                      |     | -5.811      |     | -0.127                            |     | -0.246      |     |
| Variance in Real GDP Per Capita Growth Rate       | -0.011                        | *   | -0.007      |     | -1.072                      |     | -0.407      |     | -0.002                            |     | 0.003       |     |
| Land area per population (km2/person)             | -37.29                        | *** | -22.41      | *** | -259.5                      |     | 241.116     |     | 7.906                             |     | 14.016      |     |
| Concessional Funds Yes=1                          | 1.148                         | **  | 0.713       | *   | 96.391                      |     | 43.017      |     | 0.108                             |     | -0.493      |     |
| Ratification needed Yes=1                         | 0.174                         | **  | 0.143       |     | -38.13                      | *   | -26.436     | **  | 0.064                             |     | 0.164       |     |
| Project approved amount [ln(millions of USD)]     | -0.048                        | *** | -0.046      | *** | 3.402                       |     | 2.477       |     | 0.007                             |     | 0.008       |     |
| Foreign exchange instability (consecutive months) | 0.445                         | *** | 0.052       |     | -18.28                      | *   | -13.735     | *** | -0.025                            |     | 0.007       |     |
| Number of years between approval and PMR          | 0.168                         | *** | 0.14        | *** | -15.46                      | **  | -13.397     | *** | 0.145                             | *** | 0.145       | *** |
| Division = Capital Markets=1                      | -0.176                        | *** | -0.119      | *   | 10.671                      |     | -1.153      |     | -0.051                            |     | -0.001      |     |
| Division = Technology & innovation=1              | -0.072                        |     | -0.022      |     | 2.766                       |     | -4.375      |     | 0.025                             |     | 0.002       |     |
| Division = Education=1                            | -0.017                        |     | 0.062       |     | -0.194                      |     | -11.707     |     | 0.159                             | *   | 0.042       |     |
| Division = Energy=1                               | -0.038                        |     | -0.001      |     | -0.601                      |     | -7.121      |     | 0.164                             | *   | 0.076       |     |
| Division = Institutional Capacity=1               | -0.058                        |     | 0.029       |     | 5.67                        |     | -4.975      |     | 0.071                             |     | 0.028       |     |

|                                         |        |     |        |     |        |    |         |    |        |     |        |   |
|-----------------------------------------|--------|-----|--------|-----|--------|----|---------|----|--------|-----|--------|---|
| Division = Labor Markets=1              | 0.227  | **  | 0.183  | *   | -1.701 |    | -5.673  |    | 0.424  | *** | 0.224  | * |
| Division = Agriculture & Environment=1  | -0.139 | **  | -0.082 |     | 24.657 | *  | 11.49   |    | -0.091 | *   | -0.073 |   |
| Division = Social Protection & Health=1 | 0.092  |     | 0.163  | **  | -1.421 |    | -9.128  |    | 0.114  |     | 0.08   |   |
| Division = Trade & Integration=1        | -0.379 | *** | -0.241 | *** | 62.458 | ** | 47.122  | ** | -0.28  | *   | -0.168 |   |
| Division = Transport=1                  | -0.051 |     | 0.005  |     | 10.998 |    | -4.046  |    | -0.008 |     | -0.027 |   |
| Division = Water & Sanitation=1         | -0.042 |     | 0.017  |     | -4.249 |    | -9.154  |    | 0.095  | *   | 0.019  |   |
| Argentina=1                             | 1.062  | *** | 0.648  | *** | -2.434 |    | -3.16   |    | -0.116 |     | -0.325 |   |
| Bahamas, The=1                          | -1.863 | *** | -1.192 | *** | 22.065 |    | 33.19   |    | 0.12   |     | 0.208  |   |
| Barbados=1                              | -0.678 | *** | -0.332 | **  | -10.96 |    | 1.786   |    | -0.142 |     | -0.263 |   |
| Belize=1                                | 0.828  | **  | 0.496  | *   | -7.22  |    | -8.145  |    | -0.095 |     | -0.098 |   |
| Bolivia=1                               | 1.18   | **  | 0.696  | **  | -60.41 |    | -41.306 |    | -0.591 |     | -0.518 |   |
| Chile=1                                 | -0.488 | *** | -0.442 | *** | 34.771 |    | 42.724  | ** | -0.182 |     | -0.283 |   |
| Colombia=1                              | -0.8   | *** | -0.496 | *** | 37.356 |    | 36.392  |    | 0.187  |     | 0.199  |   |
| Costa Rica=1                            | -1.083 | *** | -0.753 | *** | 1.72   |    | 26.509  |    | 0.293  |     | 0.183  |   |
| Dominican Republic=1                    | -1.438 | *** | -0.839 | **  | 26.319 |    | 33.374  |    | 0.352  |     | 0.481  |   |
| Ecuador=1                               | -0.957 | *** | -0.636 | *** | -17.44 |    | 8.191   |    | 0.179  |     | 0.254  |   |
| El Salvador=1                           | -1.652 | *** | -1.017 | *** | 23.482 |    | 36.098  |    | 0.137  |     | 0.445  |   |
| Guatemala=1                             | -3.409 | *** | -1.715 | *** | -83.38 |    | -3.594  |    | 0.341  |     | 1.011  |   |
| Guyana=1                                | 7.081  | *** | 4.588  | *** | 13.718 |    | -82.767 |    | -1.626 |     | -2.278 |   |
| Haiti=1                                 | -1.681 | *** | -1.067 | *** | 23.784 |    | 36.236  |    | 0.152  |     | 0.246  |   |
| Honduras=1                              | -2.258 | *** | -1.454 | *** | -77.41 |    | -14.861 |    | 0.362  |     | 0.915  |   |
| Jamaica=1                               | -1.625 | *** | -1.135 | *** | -9.858 |    | 42.915  |    | 0.198  |     | 0.292  |   |
| Mexico=1                                | -0.875 | *** | -0.487 | **  | -16.37 |    | 0.549   |    | 0.436  |     | 0.476  |   |
| Nicaragua=1                             | -1.849 | *** | -1.133 | **  | -72.86 |    | -15.592 |    | 0.343  |     | 0.928  |   |
| Panama=1                                | 0.051  |     | 0.057  |     | 0.608  |    | -2.216  |    | 0.081  |     | 0.002  |   |
| Paraguay=1                              | -0.89  | *** | -0.57  | **  | 35.329 |    | 48.504  |    | 0.256  |     | 0.313  |   |
| Suriname=1                              | 9.483  | *** | 5.577  | **  | 76.822 |    | -43.352 |    | -2.103 |     | -3.676 |   |
| Trinidad and Tobago=1                   | -1.635 | *** | -1.168 | *** | 58.802 |    | 83.257  |    | 0.237  |     | 0.487  |   |
| Venezuela, RB=1                         |        |     |        |     | -20.18 |    | -9.087  |    | 0.384  |     | 0.313  |   |
| Uruguay=1                               | 0.359  | *** | 0.158  |     | 9.996  |    | 11.582  |    | 0.008  |     | -0.083 |   |
| Constant                                |        |     |        |     | 88.753 |    | 49.254  |    |        |     |        |   |

|                        |       |       |       |       |       |       |
|------------------------|-------|-------|-------|-------|-------|-------|
| Number of observations | 497   | 853   | 497   | 853   | 497   | 853   |
| Pseudo R2              | 0.341 |       |       |       | 0.262 |       |
| Adjusted R2            |       |       | 0.198 |       |       |       |
| corr[Y, E(Y X)]        |       | 0.523 |       | 0.463 |       | 0.505 |

\* p<0.10, \*\* p<0.05, \*\*\* p<0.01

## Appendix B. Full Results: Schedule Performance Difference, % Disbursed, Synthetic Indicator

|                                                   | Schedule Performance Difference |     |                      |     | % Disbursed            |     |                      |     | Synthetic Indicator    |     |                      |     |
|---------------------------------------------------|---------------------------------|-----|----------------------|-----|------------------------|-----|----------------------|-----|------------------------|-----|----------------------|-----|
|                                                   | Last Score<br>(Probit)          |     | Full Sample<br>(GEE) |     | Last Score<br>(Probit) |     | Full Sample<br>(GEE) |     | Last Score<br>(Probit) |     | Full Sample<br>(GEE) |     |
| Project Logic Score                               | -1.763                          | *   | -2.09                | **  | 0.005                  |     | 0.002                |     | 0.051                  | *** | 0.042                | *** |
| Economic Analysis Score                           | 1.813                           |     | -3.258               |     | -0.021                 |     | -0.01                |     | 0.003                  |     | 0.048                |     |
| Monitoring Score                                  | -8.275                          |     | -0.81                |     | -0.077                 |     | -0.092               |     | -0.047                 |     | -0.147               |     |
| Evaluation Score                                  | 0.975                           |     | 0.604                |     | -0.002                 |     | -0.004               |     | -0.005                 |     | -0.001               |     |
| Year=2009                                         | -11.897                         | **  | -10.129              | **  | -0.2                   | *** | 0.068                |     | -0.267                 | *** | -0.071               |     |
| Year=2010                                         | -31.242                         | *** | -20.257              | *** | -0.467                 | *** | 0.082                |     | -0.6                   | *** | -0.275               | *** |
| Year=2011                                         | -41.662                         | *** | -24.754              | *** | -0.697                 | *** | 0.165                | *** | -0.845                 | *** | -0.348               | **  |
| Year=2012                                         | -58.473                         | *** | -39.903              | *** | -1.034                 | *** | 0.148                | **  | -1.059                 | *** | -0.265               |     |
| Year=2013                                         | -70.411                         | *** | -20.906              |     | -1.263                 | *** | 0.192                | **  | -1.217                 | *** | -0.323               |     |
| Year=2014                                         | -120.53                         | *** | -82.468              | *** | -1.442                 | *** | 0.327                | *** | -1.235                 | *** | -0.147               |     |
| Project Delay                                     | 0.382                           | *** | 0.359                | *** | -0.005                 | *** | -0.005               | *** | -0.007                 | *** | -0.006               | *** |
| Specific Project Yes=1                            | -2.483                          |     | -1.519               |     | -0.071                 | *** | -0.08                | *** | -0.093                 | *   | -0.109               | **  |
| % Change in Real GDP Per Capita                   | 7.633                           |     | 5.663                |     | 0.588                  | *   | 0.561                | *   | -0.263                 |     | -0.353               |     |
| Variance in Real GDP Per Capita Growth Rate       | -0.134                          |     | -0.387               |     | -0.003                 |     | -0.001               |     | 0.003                  |     | 0.005                |     |
| Land area per population (km2/person)             | -3426.4                         | *   | -2704                | **  | 15.56                  |     | 10.717               |     | 49.001                 | *   | 42.715               | **  |
| Concessional Funds Yes=1                          | 83.784                          |     | 92.397               | **  | -0.237                 |     | -0.237               |     | -0.99                  |     | -0.898               |     |
| Ratification needed Yes=1                         | -14.167                         |     | -19.962              | **  | -0.046                 |     | -0.035               |     | -0.163                 |     | -0.201               |     |
| Project approved amount [ln(millions of USD)]     | -0.253                          |     | -0.353               |     | -0.007                 |     | -0.011               |     | -0.015                 |     | -0.03                |     |
| Foreign exchange instability (consecutive months) | -4.178                          |     | -5.434               |     | 0.008                  |     | 0.009                |     | 0.149                  |     | 0.111                |     |
| Number of years between approval and PMR          | -22.48                          | *** | -14.919              | *** | -0.143                 | *** | 0.169                | *** | -0.222                 | *** | -0.051               | *   |
| Division = Capital Markets=1                      | 9.794                           |     | 5.666                |     | 0.063                  |     | 0.164                | *   | -0.228                 |     | -0.083               |     |
| Division = Technology & innovation=1              | -2.547                          |     | 3.038                |     | 0.027                  |     | 0.014                |     | -0.011                 |     | -0.011               |     |
| Division = Education=1                            | -4.712                          |     | -5.717               |     | 0.123                  | **  | 0.135                | *** | 0.199                  | *   | 0.218                | **  |
| Division = Energy=1                               | -4.257                          |     | 0.503                |     | 0.102                  | *   | 0.103                | **  | -0.079                 |     | -0.044               |     |



|                                         |         |     |         |     |        |     |        |    |        |    |        |     |
|-----------------------------------------|---------|-----|---------|-----|--------|-----|--------|----|--------|----|--------|-----|
| Division = Institutional Capacity=1     | -4.487  |     | -1.713  |     | 0.061  |     | 0.056  |    | -0.05  |    | -0.058 |     |
| Division = Labor Markets=1              | -21.992 | **  | -17.899 | **  | -0.141 | **  | -0.1   |    | 0.027  |    | 0.124  |     |
| Division = Agriculture & Environment=1  | 10.321  | *   | 5.51    |     | -0.047 |     | -0.024 |    | -0.193 |    | -0.119 |     |
| Division = Social Protection & Health=1 | -7.512  |     | -8.47   | *   | 0.07   |     | 0.107  | ** | -0.025 |    | 0.037  |     |
| Division = Trade & Integration=1        | 19.757  | *   | 12.589  |     | -0.056 |     | -0.068 |    | -0.433 | ** | -0.327 | **  |
| Division = Transport=1                  | 0.624   |     | -0.238  |     | 0.08   | **  | 0.089  | ** | 0.014  |    | 0.091  |     |
| Division = Water & Sanitation=1         | -8.178  |     | -2.347  |     | -0.001 |     | -0.003 |    | -0.021 |    | -0.019 |     |
| Argentina=1                             | 72.522  |     | 58.686  | *   | -0.333 |     | -0.237 |    | -1.16  | *  | -1.037 | **  |
| Bahamas, The=1                          | -117.06 |     | -91.53  | *   | 0.403  |     | 0.218  |    | 1.589  |    | 1.485  | *   |
| Barbados=1                              | -51.394 | *   | -25.564 |     | 0.261  |     | 0.162  |    | 0.363  |    | 0.312  |     |
| Belize=1                                | 134.74  |     | 84.368  | *   | -0.395 |     | -0.32  |    | -1.345 |    | -1.216 | **  |
| Bolivia=1                               | 148.41  |     | 101.385 |     | -0.738 |     | -0.455 |    | -1.893 |    | -1.546 | *   |
| Chile=1                                 | 25.861  |     | 31.427  | *   | 0.052  |     | 0.041  |    | -0.221 |    | -0.298 |     |
| Colombia=1                              | -63.325 | *   | -44.152 | *   | 0.274  |     | 0.207  |    | 0.502  |    | 0.359  |     |
| Costa Rica=1                            | -109.35 | *   | -66.095 |     | 0.425  |     | 0.234  |    | 2.073  | ** | 1.868  | *** |
| Dominican Republic=1                    | -115.78 |     | -85.197 | *   | 0.662  |     | 0.458  |    | 2.05   | ** | 1.864  | **  |
| Ecuador=1                               | -91.32  | *   | -63.179 | *   | 0.484  |     | 0.387  |    | 1.146  | *  | 0.912  | *   |
| El Salvador=1                           | -119.5  |     | -88.161 | *   | 0.899  | *   | 0.666  | *  | 2.135  | ** | 1.97   | **  |
| Guatemala=1                             | -219.23 | *   | -195.79 | **  | 0.856  |     | 0.641  |    | 2.833  | *  | 2.521  | **  |
| Guyana=1                                | 665.603 | *   | 491.281 | *   | -3.513 |     | -2.461 |    | -9.707 | *  | -8.223 | **  |
| Haiti=1                                 | -123.66 |     | -84.489 |     | 0.679  |     | 0.444  |    | 1.821  | *  | 1.519  | **  |
| Honduras=1                              | -171.31 | *   | -149.56 | **  | 0.965  |     | 0.808  |    | 2.763  | ** | 2.43   | **  |
| Jamaica=1                               | -119.48 |     | -88.907 | *   | 0.555  |     | 0.368  |    | 1.458  |    | 1.18   |     |
| Mexico=1                                | -98.367 | *   | -70.234 | **  | 0.661  | **  | 0.57   | ** | 1.214  | *  | 1.07   | **  |
| Nicaragua=1                             | -153.35 | *   | -136.87 | **  | 0.692  |     | 0.553  |    | 2.295  | *  | 2.124  | **  |
| Panama=1                                | -3.594  |     | 1.392   |     | -0.012 |     | -0.04  |    | 0.012  |    | -0.005 |     |
| Paraguay=1                              | -70.425 |     | -43.449 |     | 0.277  |     | 0.14   |    | 1.307  | ** | 1.175  | **  |
| Suriname=1                              | 901.03  | *   | 718.462 | **  | -4.319 |     | -2.874 |    | -13.18 | ** | -11.42 | **  |
| Trinidad and Tobago=1                   | -106.96 |     | -75.908 |     | 0.167  |     | 0.261  |    | 1.548  |    | 1.538  | *   |
| Venezuela, RB=1                         | -78.714 | *** | -57.116 | *** | -0.137 |     | 0.085  |    | 0.296  |    | 0.335  |     |
| Uruguay=1                               | 26.459  |     | 30.381  | **  | -0.458 | *** | -0.146 |    | -0.645 | ** | -0.425 | *   |

|                        |             |             |          |        |          |          |
|------------------------|-------------|-------------|----------|--------|----------|----------|
| Constant               | 312.421 *** | 232.759 *** | 1.424 ** | -0.358 | 2.601 ** | 1.942 ** |
| Number of observations | 497         | 853         | 460      | 763    | 460      | 755      |
| Pseudo R2              |             |             |          |        |          |          |
| Adjusted R2            | 0.293       |             | 0.588    |        | 0.171    |          |
| corr[Y, E(Y X)]        |             | 0.558       |          | 0.764  |          | 0.472    |

\* p<0.10, \*\* p<0.05, \*\*\* p<0.01
